# Supplementary material for: Gut microbiota composition during a 12-week intervention with delayed-release dimethyl fumarate in multiple sclerosis – a pilot trial
Source: PubMed Central journal article supplement — Mult Scler J Exp Transl Clin. 2019 Nov 15;5(4):2055217319888767. doi: 10.1177/2055217319888767 (PMC6859687; doi:10.1177/2055217319888767), 2019-11-15

**Supplementary figure 1.** Global microbiota differences between MS (blue) and healthy controls (red), measured by beta diversity (weighted unifrac, Adonis P-value=0.01, R2=0.01). Statistical analysis by PERMANOVA.

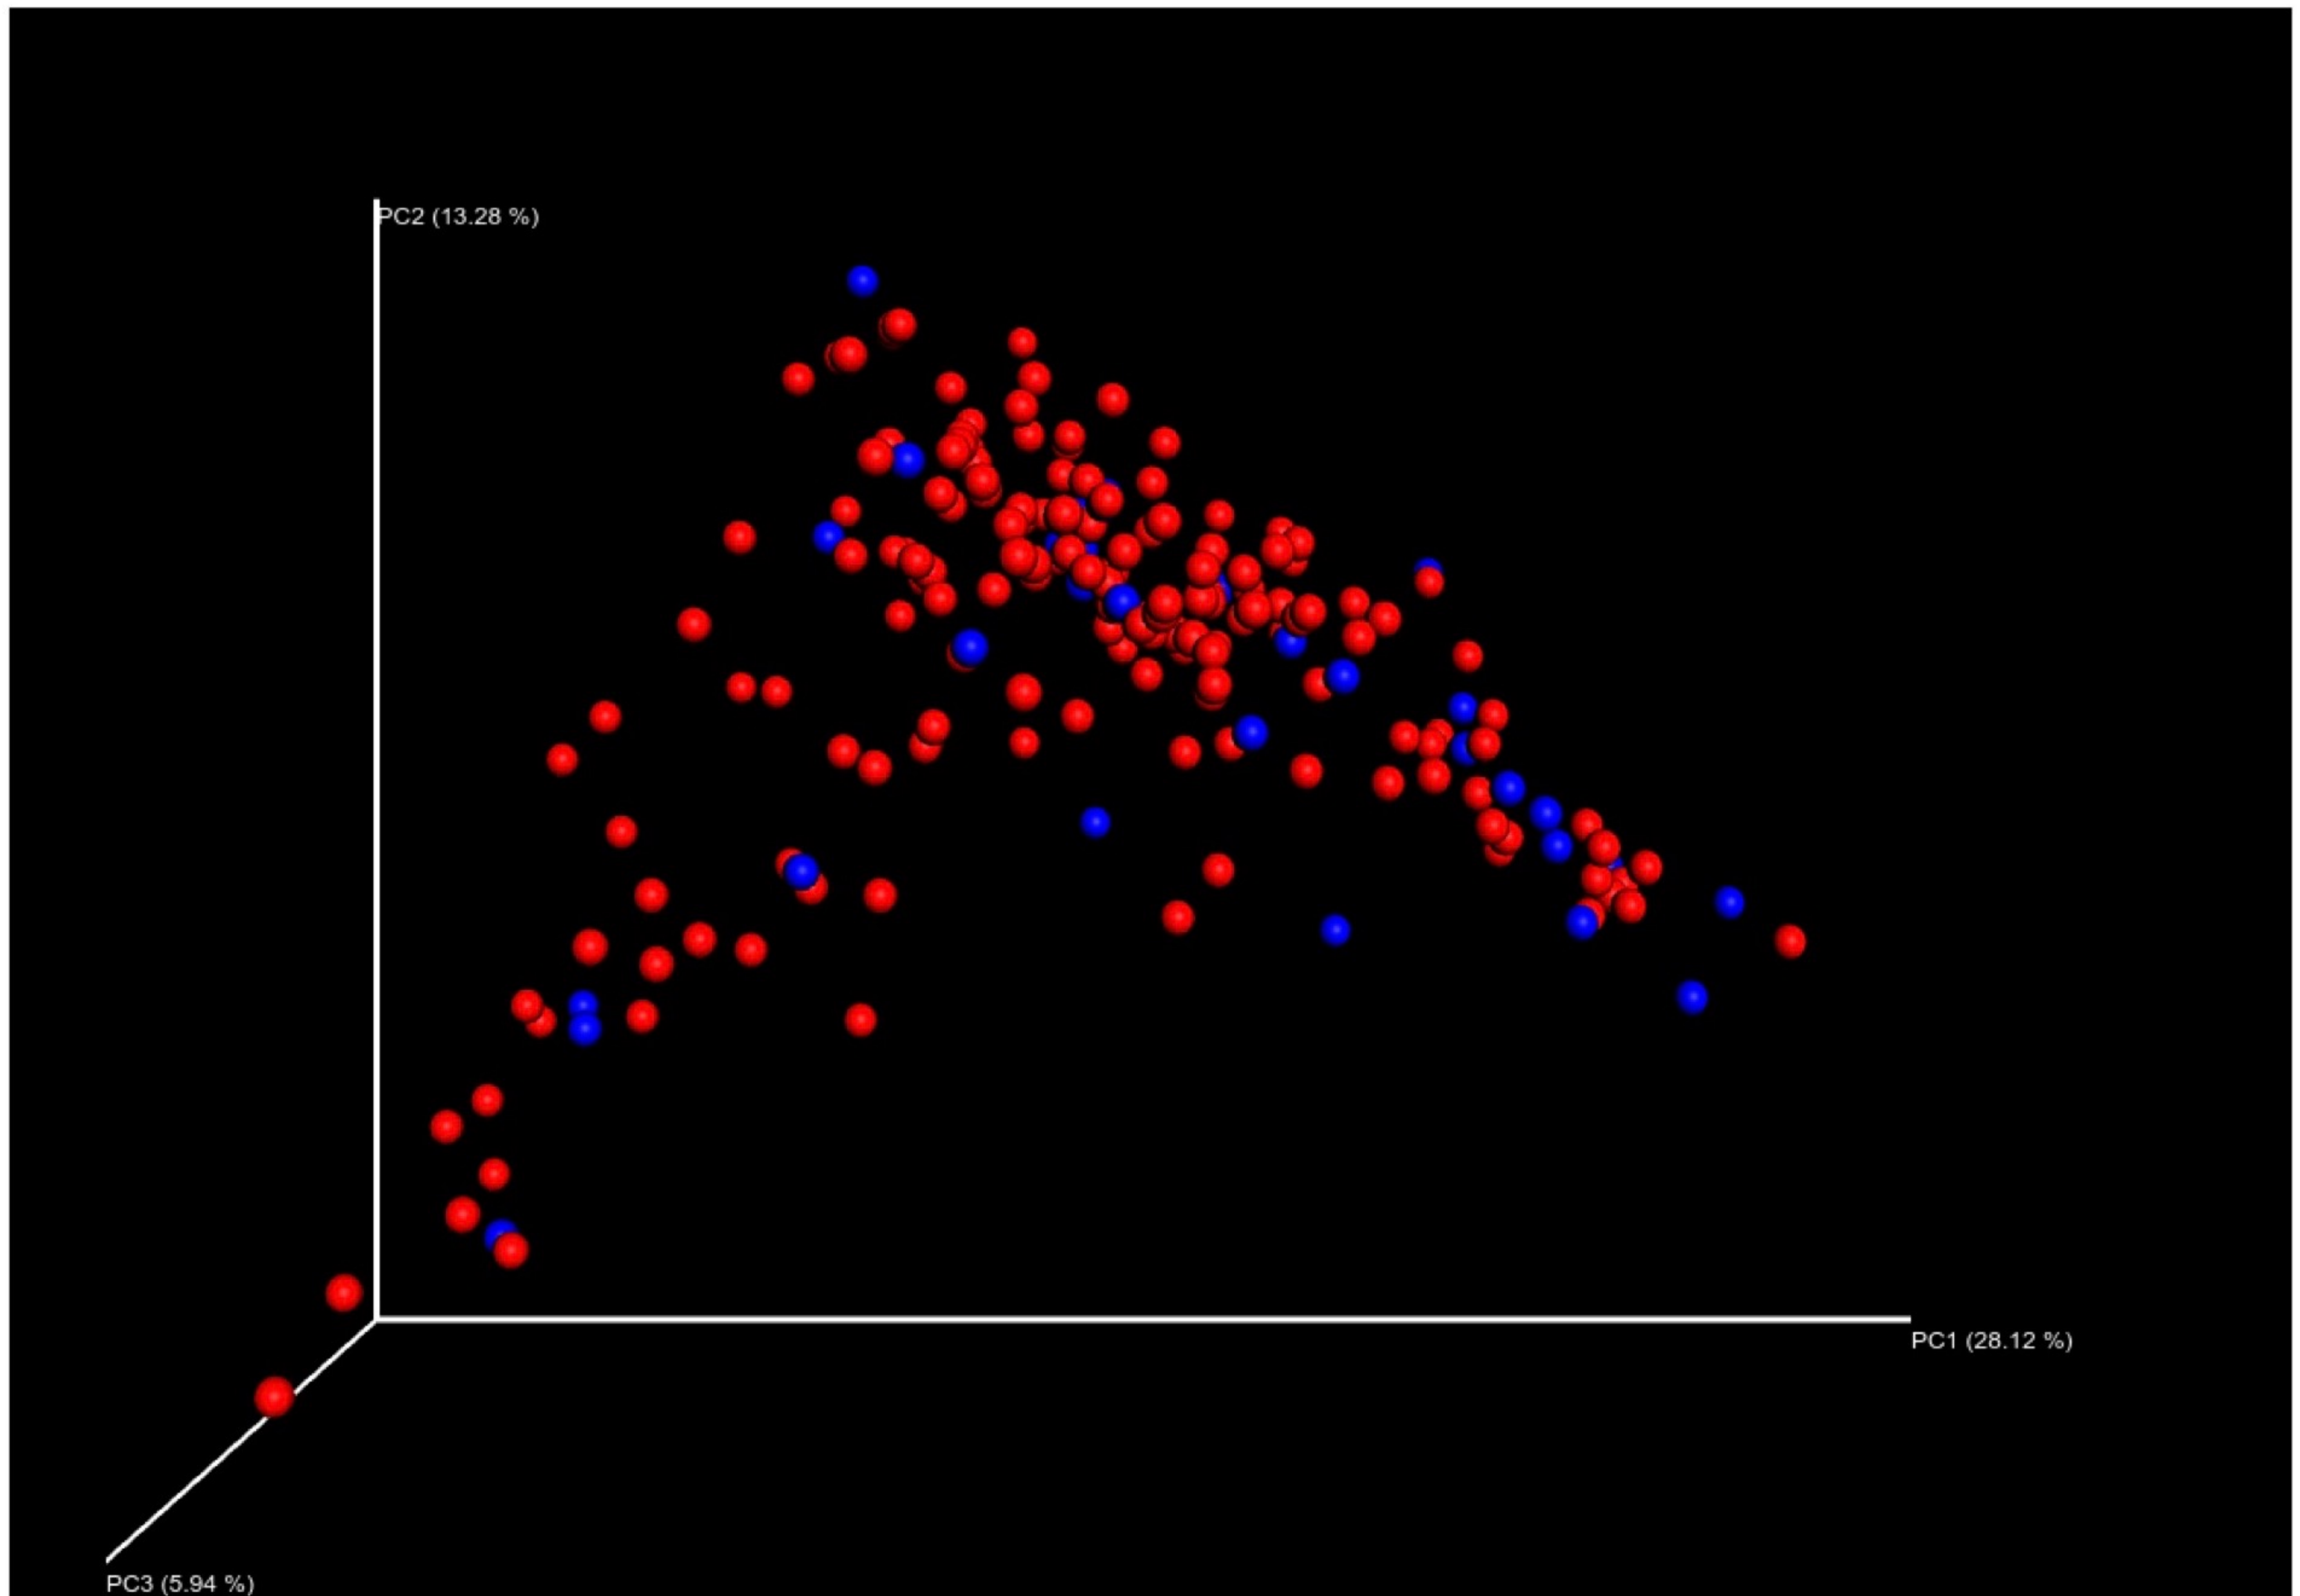

Supplement: MSO888767_Supplemetal_Material2.pdf [file MSO888767_Supplemetal_Material2.pdf]
