# Supplementary material for: Gut microbiota composition during a 12-week intervention with delayed-release dimethyl fumarate in multiple sclerosis – a pilot trial
Source: PubMed Central journal article supplement — Mult Scler J Exp Transl Clin. 2019 Nov 15;5(4):2055217319888767. doi: 10.1177/2055217319888767 (PMC6859687; doi:10.1177/2055217319888767), 2019-11-15
Supplement: MSO888767_Supplemetal_Material3.pdf [file MSO888767_Supplemetal_Material3.pdf]

D\_0\_\_Bacteria;D\_1\_\_Proteobacteria;D\_2\_\_Gammaproteobacteria;D\_3\_\_Enterobacteriales;D\_4\_\_E  
D\_0\_\_Bacteria;D\_1\_\_Actinobacteria;D\_2\_\_Coriobacteriia;D\_3\_\_Coriobacteriales;D\_4\_\_Coriobacte  
D\_0\_\_Bacteria;D\_1\_\_Firmicutes;D\_2\_\_Clostridia;D\_3\_\_Clostridiales;D\_4\_\_Peptococcaceae;D\_5\_\_C  
D\_0\_\_Bacteria;D\_1\_\_Firmicutes;D\_2\_\_Clostridia;D\_3\_\_Clostridiales;D\_4\_\_Lachnospiraceae;D\_5\_\_L  
D\_0\_\_Bacteria;D\_1\_\_Firmicutes;D\_2\_\_Clostridia;D\_3\_\_Thermoanaerobacterales;D\_4\_\_Thermoana  
D\_0\_\_Bacteria;D\_1\_\_Tenericutes;D\_2\_\_Mollicutes;D\_3\_\_Mollicutes RF9;D\_4\_\_uncultured bacteri  
D\_0\_\_Bacteria;D\_1\_\_Actinobacteria;D\_2\_\_Coriobacteriia;D\_3\_\_Coriobacteriales;D\_4\_\_Coriobacte  
D\_0\_\_Bacteria;D\_1\_\_Firmicutes;D\_2\_\_Clostridia;D\_3\_\_Clostridiales;D\_4\_\_Ruminococcaceae;D\_5\_\_C  
D\_0\_\_Bacteria;D\_1\_\_Bacteroidetes;D\_2\_\_Flavobacteriia;D\_3\_\_Flavobacteriales;D\_4\_\_Flavobacteri  
D\_0\_\_Bacteria;D\_1\_\_Firmicutes;D\_2\_\_Erysipelotrichia;D\_3\_\_Erysipelotrichales;D\_4\_\_Erysipelotric  
D\_0\_\_Bacteria;D\_1\_\_Firmicutes;D\_2\_\_Clostridia;D\_3\_\_Clostridiales;D\_4\_\_Ruminococcaceae;D\_5\_\_C  
D\_0\_\_Bacteria;D\_1\_\_Actinobacteria;D\_2\_\_Coriobacteriia;D\_3\_\_Coriobacteriales;D\_4\_\_Coriobacte  
D\_0\_\_Bacteria;D\_1\_\_Firmicutes;D\_2\_\_Clostridia;D\_3\_\_Clostridiales;D\_4\_\_Lachnospiraceae;D\_5\_\_L  
D\_0\_\_Bacteria;D\_1\_\_Firmicutes;D\_2\_\_Clostridia;D\_3\_\_Clostridiales;D\_4\_\_Lachnospiraceae;D\_5\_\_L  
D\_0\_\_Bacteria;D\_1\_\_Fusobacteria;D\_2\_\_Fusobacteriia;D\_3\_\_Fusobacteriales;D\_4\_\_Fusobacteriac  
D\_0\_\_Bacteria;D\_1\_\_Tenericutes;D\_2\_\_Mollicutes;D\_3\_\_Mollicutes RF9;Ambiguous\_taxa;Ambigu  
D\_0\_\_Bacteria;D\_1\_\_Actinobacteria;D\_2\_\_Coriobacteriia;D\_3\_\_Coriobacteriales;D\_4\_\_Coriobacte  
D\_0\_\_Bacteria;D\_1\_\_Firmicutes;D\_2\_\_Clostridia;D\_3\_\_Clostridiales;D\_4\_\_Ruminococcaceae;D\_5\_\_C  
D\_0\_\_Bacteria;D\_1\_\_Firmicutes;D\_2\_\_Clostridia;D\_3\_\_Clostridiales;D\_4\_\_Lachnospiraceae;D\_5\_\_L  
D\_0\_\_Bacteria;D\_1\_\_Firmicutes;D\_2\_\_Clostridia;D\_3\_\_Clostridiales;D\_4\_\_Lachnospiraceae;D\_5\_\_L  
D\_0\_\_Bacteria;D\_1\_\_Firmicutes;D\_2\_\_Clostridia;D\_3\_\_Clostridiales;D\_4\_\_Peptostreptococcaceae;  
D\_0\_\_Bacteria;D\_1\_\_Bacteroidetes;D\_2\_\_Bacteroidia;D\_3\_\_Bacteroidales;D\_4\_\_Porphyromonada  
D\_0\_\_Bacteria;D\_1\_\_Bacteroidetes;D\_2\_\_Bacteroidia;D\_3\_\_Bacteroidales;D\_4\_\_Porphyromonada  
D\_0\_\_Bacteria;D\_1\_\_Bacteroidetes;D\_2\_\_Bacteroidia;D\_3\_\_Bacteroidales;D\_4\_\_Rikenellaceae;D\_4  
D\_0\_\_Bacteria;D\_1\_\_Bacteroidetes;D\_2\_\_Bacteroidia;D\_3\_\_Bacteroidales;D\_4\_\_Bacteroidales S24  
D\_0\_\_Bacteria;D\_1\_\_Firmicutes;D\_2\_\_Bacilli;D\_3\_\_Lactobacillales;D\_4\_\_Enterococcaceae;D\_5\_\_E  
D\_0\_\_Bacteria;D\_1\_\_Firmicutes;D\_2\_\_Clostridia;D\_3\_\_Clostridiales;D\_4\_\_Lachnospiraceae;D\_5\_\_L  
D\_0\_\_Bacteria;D\_1\_\_Firmicutes;D\_2\_\_Clostridia;D\_3\_\_Clostridiales;D\_4\_\_Lachnospiraceae;D\_5\_\_L  
D\_0\_\_Bacteria;D\_1\_\_Proteobacteria;D\_2\_\_Gammaproteobacteria;D\_3\_\_Aeromonadales;D\_4\_\_Su  
D\_0\_\_Bacteria;D\_1\_\_Proteobacteria;D\_2\_\_Gammaproteobacteria;D\_3\_\_Enterobacteriales;D\_4\_\_E  
D\_0\_\_Bacteria;D\_1\_\_Proteobacteria;D\_2\_\_Gammaproteobacteria;D\_3\_\_Enterobacteriales;D\_4\_\_E  
D\_0\_\_Bacteria;D\_1\_\_Firmicutes;D\_2\_\_Clostridia;D\_3\_\_Clostridiales;D\_4\_\_Lachnospiraceae;D\_5\_\_L  
D\_0\_\_Bacteria;D\_1\_\_Firmicutes;D\_2\_\_Clostridia;D\_3\_\_Clostridiales;D\_4\_\_Clostridiaceae 1;D\_5\_\_C

| median_Heal | median_MS | mean_Health | mean_MS | MannW_pval | MannW_pvalue_fdr |
|-------------|-----------|-------------|---------|------------|------------------|
| 0.00000     | 0.00000   | 0.00000     | 0.00037 | 0.00000    | 0.00013          |
| 0.00000     | 0.00000   | 0.00014     | 0.00000 | 0.00001    | 0.00134          |
| 0.00000     | 0.00000   | 0.00010     | 0.00001 | 0.00004    | 0.00279          |
| 0.00000     | 0.00000   | 0.00000     | 0.00054 | 0.00013    | 0.00626          |
| 0.00000     | 0.00000   | 0.00007     | 0.00000 | 0.00022    | 0.00837          |
| 0.00000     | 0.00000   | 0.00012     | 0.00023 | 0.00048    | 0.01324          |
| 0.00000     | 0.00000   | 0.00024     | 0.00000 | 0.00048    | 0.01324          |
| 0.00000     | 0.00000   | 0.00014     | 0.00000 | 0.00090    | 0.02128          |
| 0.00000     | 0.00000   | 0.00000     | 0.00007 | 0.00102    | 0.02128          |
| 0.00028     | 0.00009   | 0.00046     | 0.00020 | 0.00110    | 0.02128          |
| 0.07829     | 0.05122   | 0.09379     | 0.05925 | 0.00141    | 0.02228          |
| 0.00000     | 0.00000   | 0.00007     | 0.00000 | 0.00149    | 0.02228          |
| 0.00056     | 0.00028   | 0.00087     | 0.00044 | 0.00156    | 0.02228          |
| 0.00000     | 0.00000   | 0.00000     | 0.00001 | 0.00185    | 0.02228          |
| 0.00000     | 0.00000   | 0.00000     | 0.00060 | 0.00185    | 0.02228          |
| 0.00000     | 0.00000   | 0.00000     | 0.00005 | 0.00185    | 0.02228          |
| 0.00000     | 0.00000   | 0.00006     | 0.00001 | 0.00744    | 0.08452          |
| 0.00000     | 0.00000   | 0.00017     | 0.00000 | 0.00867    | 0.09295          |
| 0.00028     | 0.00009   | 0.00054     | 0.00028 | 0.01063    | 0.10361          |
| 0.00074     | 0.00042   | 0.00124     | 0.00063 | 0.01074    | 0.10361          |
| 0.00000     | 0.00000   | 0.00005     | 0.00001 | 0.02184    | 0.17777          |
| 0.00000     | 0.00000   | 0.00063     | 0.00017 | 0.02256    | 0.17777          |
| 0.00241     | 0.00501   | 0.00396     | 0.00607 | 0.02399    | 0.17777          |
| 0.00000     | 0.00000   | 0.00364     | 0.00135 | 0.02735    | 0.17777          |
| 0.00000     | 0.00000   | 0.00000     | 0.00017 | 0.02855    | 0.17777          |
| 0.00000     | 0.00000   | 0.00000     | 0.00000 | 0.02855    | 0.17777          |
| 0.00000     | 0.00000   | 0.00000     | 0.00000 | 0.02855    | 0.17777          |
| 0.00000     | 0.00000   | 0.00000     | 0.00000 | 0.02855    | 0.17777          |
| 0.00000     | 0.00000   | 0.00000     | 0.00042 | 0.02855    | 0.17777          |
| 0.00000     | 0.00000   | 0.00000     | 0.00011 | 0.02855    | 0.17777          |
| 0.00000     | 0.00000   | 0.00000     | 0.00013 | 0.02855    | 0.17777          |
| 0.00000     | 0.00009   | 0.00010     | 0.00016 | 0.04521    | 0.27267          |
| 0.00028     | 0.00005   | 0.00244     | 0.00162 | 0.04900    | 0.28655          |
