# Supplementary material for: Gut microbiota composition during a 12-week intervention with delayed-release dimethyl fumarate in multiple sclerosis – a pilot trial
Source: PubMed Central journal article supplement — Mult Scler J Exp Transl Clin. 2019 Nov 15;5(4):2055217319888767. doi: 10.1177/2055217319888767 (PMC6859687; doi:10.1177/2055217319888767), 2019-11-15
Supplement: MSO888767_Supplemetal_Material4.pdf [file MSO888767_Supplemetal_Material4.pdf]

## Supplementary tables

**Supplementary table 1** Recruitment sites for study participants.

| <b>Study site</b>                     | <b>Dimethyl fumarate<br/>(n=27)</b> | <b>Injectable drug<br/>(n=9)</b> |
|---------------------------------------|-------------------------------------|----------------------------------|
| Akershus University Hospital          | 14                                  | 2                                |
| Haukeland University Hospital, Bergen | 5                                   | 0                                |
| Innlandet Hospital, Lillehammer       | 1                                   | 2                                |
| Oslo University Hospital, Ullevål     | 0                                   | 1                                |
| Vestre Viken HF, Drammen              | 2                                   | 0                                |
| Helse Møre og Romsdal HF, Molde       | 3                                   | 1                                |
| Stavanger Universitetssykehus         | 2                                   | 3                                |

**Supplementary table 2**

Please find attached excel-file.

**Supplementary table 3.** Previous cross-sectional studies of the gut microbiota profile in adults with RRMS compared with healthy controls.

| <b>Study</b>                   | <b>Participants</b>                 | <b>Associated genera</b>                                                                                                                                                                                                                                                                                                                                                                                                                                                |
|--------------------------------|-------------------------------------|-------------------------------------------------------------------------------------------------------------------------------------------------------------------------------------------------------------------------------------------------------------------------------------------------------------------------------------------------------------------------------------------------------------------------------------------------------------------------|
| Cantarel BL et al(41)          | 7 RRMS, 8 healthy controls          | <u>Reduced:</u><br><i>Bacteroidaceae, Faecalibacterium</i><br><u>Increased:</u><br><i>Ruminococcus</i>                                                                                                                                                                                                                                                                                                                                                                  |
| Miyake et al. 2015(3)          | 20 MS patients, 40 healthy controls | <u>Reduced:</u><br><i>Faecalibacterium, Prevotella, Anaerostipes</i>                                                                                                                                                                                                                                                                                                                                                                                                    |
| Jangi et al. 2016(1)           | 60 MS patient, 43 healthy controls  | <u>Reduced:</u><br><i>Butyricimonas, Paraprevotella, Haemophilus, Slackia, Collinsella, Veillonellaceae_unc, Prevotella, Sutterella, Sarcina, Mollicutes_unc, Prevotellaceae_unc, Barnesiella, Acidaminococcaceae_unc, Guggenheimella, Buttiauxella, Sporanaerobacter</i><br><u>Increased:</u><br><i>Methanobrevibacter, Akkermansia, Megasphaera, Cloacibacillus, Clostridia_unc, Holdemania, Desulfovibrio, Peptococcaceae_unc, Megamonas, Thermoplasmatales_unc,</i> |
| Chen et al. 2016(2)            | 31 MS patients, 36 controls         | <u>Reduced:</u><br><i>Adlercreutzia, Collinsella, Actinobacteria_unclassified, Parabacteroides, Coprobacillus, Lactobacillus, Haemophilus</i><br><u>Increased:</u><br><i>Flavobacterium, Pedobacter, Blautia, Dorea, Mycoplana, Pseudomonas</i>                                                                                                                                                                                                                         |
| Cekanaviciute E et al. 2017(6) | 71 RRMS, 71 HC                      | <u>Reduced:</u> <i>Paraprevotellaceae_unc, Prevotella, Serratia, Bacillus, Acidaminococcus, Clostridium, Aquamonas, Parabacteroides, Phascolarctobacterium, Pseudomonadaceae_unc</i><br><u>Increased:</u><br><i>Acinetobacter, Varibaculum, Corynebacterium, Bifidobacterium, Megamonas, Mogibacteriaceae_unc, Megasphaera, Klebsiella, Peptostreptococcaceae_unc, ph2, actinomyces, Mogibacterium, Akkermansia, SMB53, Bulleidia</i>                                   |

**Supplementary table 4.** Differences in gut microbial taxa the subset of patients having increased GSRS score after 2 weeks of treatment with DMF (n=10).

|                         | <b>Baseline</b>        | <b>2 weeks</b>         | <b>P-value</b> |
|-------------------------|------------------------|------------------------|----------------|
| Actinobacteria          | 0.021<br>(0.008-0.035) | 0.011<br>(0.003-0.024) | 0.20           |
| Bacteroidetes           | 0.206<br>(0.171-0.372) | 0.192<br>(0.145-0.368) | 0.59           |
| Firmicutes              | 0.708<br>(0.528-0.767) | 0.686<br>(0.515-0.782) | 0.80           |
| <i>Bacteroides</i>      | 0.124<br>(0.078-0.21)  | 0.14<br>(0.052-0.26)   | 0.59           |
| <i>Bifidobacterium</i>  | 0.012<br>(0.003-0.031) | 0.005<br>(0-0.015)     | 0.37           |
| <i>Faecalibacterium</i> | 0.056<br>(0.031-0.088) | 0.058<br>(0.024-0.139) | 0.58           |

**Supplementary table 5.** Differences in gut microbial taxa at different phylogenetic levels at baseline and at two weeks in patients having increase or no increase in GSRs score after 2 weeks of treatment with DMF.

|                                | Baseline            |                    |       |                  | 2 weeks             |                    |       |                  |
|--------------------------------|---------------------|--------------------|-------|------------------|---------------------|--------------------|-------|------------------|
|                                | No increase in GSRs | Increased GSRs     | P     | Q <sub>FDR</sub> | No increase in GSRs | Increased GSRs     | P     | Q <sub>FDR</sub> |
| Uncultured Christensenellaceae | 0(0-0.001)          | 0(0-0)             | 0.014 | 0.96             | 0(0-0)              | 0(0-0)             | 0.48  | 1                |
| Lachnospiraceae NK4A136 group  | 0.01(0.004-0.022)   | 0.034(0.013-0.058) | 0.014 | 0.96             | 0.02(0.009-0.027)   | 0.025(0.01-0.09)   | 0.38  | 1                |
| Peptoclostridium               | 0(0-0)              | 0.001(0-0.001)     | 0.017 | 0.96             | 0(0-0)              | 0(0-0)             | 0.31  | 1                |
| Peptostreptococcaceae          | 0(0-0.001)          | 0.001(0-0.003)     | 0.024 | 1                | 0(0-0.001)          | 0.001(0-0.002)     | 0.28  | 1                |
| Bacteroidaceae                 | 0.308(0.125-0.408)  | 0.124(0.078-0.21)  | 0.033 | 1                | 0.133(0.088-0.361)  | 0.14(0.052-0.26)   | 0.41  | 1                |
| Bacteroides                    | 0.308(0.125-0.408)  | 0.124(0.078-0.21)  | 0.033 | 1                | 0.133(0.088-0.361)  | 0.14(0.052-0.26)   | 0.41  | 1                |
| Prevotellaceae                 | 0(0-0)              | 0(0-0.004)         | 0.037 | 1                | 0(0-0)              | 0(0-0.003)         | 0.48  | 1                |
| Odoribacter                    | 0.004(0.002-0.005)  | 0.001(0-0.002)     | 0.046 | 1                | 0.004(0.003-0.005)  | 0.003(0-0.004)     | 0.19  | 1                |
| Dialister                      | 0.018(0-0.028)      | 0.006(0-0.018)     | 0.50  | 1                | 0.018(0.008-0.032)  | 0.005(0-0.015)     | 0.023 | 1                |
| Intestinimonas                 | 0(0-0.001)          | 0(0-0)             | 0.51  | 1                | 0(0-0)              | 0(0-0)             | 0.029 | 1                |
| Coprobacter                    | 0(0-0)              | 0(0-0.001)         | 0.22  | 1                | 0(0-0)              | 0(0-0)             | 0.046 | 1                |
| Actinobacteria                 | 0.015(0.012-0.031)  | 0.021(0.008-0.035) | 0.93  | 1                | 0.011(0.006-0.022)  | 0.011(0.003-0.024) | 0.74  | 1                |
| Bifidobacterium                | 0.011(0.005-0.02)   | 0.012(0.003-0.031) | 0.76  | 1                | 0.008(0.002-0.015)  | 0.005(0-0.015)     | 0.45  | 1                |

**Supplementary table 6** Dietary differences in patients experiencing GI symptoms in DMF-group compared to those without worsening of symptoms

|                                    | No increase in GSRS score | Increased GSRS score | P-value      | Q <sub>FDR</sub> |
|------------------------------------|---------------------------|----------------------|--------------|------------------|
| Energy (kJ/day, IQR)               | 9875(8776-12822)          | 10328(7758-12290)    | 0.742        | 0.80             |
| Proteins, E% (IQR)                 | 14(13.4-15.88)            | 16.9(14.8-17.7)      | 0.078        | 0.34             |
| Fat, E% (IQR)                      | 35.9(33.6-38.2)           | 37.5(33.8-40.88)     | 0.409        | 0.70             |
| Saturated, E% (IQR)                | 13.5(11.18-15)            | 13.8(12.2-15.6)      | 0.551        | 0.72             |
| Trans saturated, E% (IQR)          | 0.4(0.2-0.4)              | 0.4(0.3-0.4)         | 0.679        | 0.80             |
| Monounsaturated, E% (IQR)          | 13(12.2-13.9)             | 13.7(10.9-15.58)     | 0.424        | 0.70             |
| Polyunsaturated, E% (IQR)          | 6.5(5.3-7.6)              | 5.9(5.1-7.3)         | 0.454        | 0.70             |
| Carbohydrates, E% (IQR)            | 47(42-51)                 | 40.1(37.9-44.6)      | <b>0.011</b> | <b>0.07</b>      |
| Starch, E% (IQR)                   | 23.1(19.1-24.8)           | 20.1(17.3-22.8)      | 0.291        | 0.70             |
| Fiber, E% (IQR)                    | 2.1(1.9-3.1)              | 2.1(1.9-2.38)        | 0.467        | 0.70             |
| Mono- and di-saccharides, E% (IQR) | 20.3(16.5-23.28)          | 19(13.3-24)          | 0.486        | 0.70             |
| Sugar, E% (IQR)                    | 5.6(3.4-14.2)             | 6(4.1-9.7)           | 0.86         | 0.86             |
| Alcohol, E% (IQR)                  | 0.3(0-0.8)                | 1.9(0.4-6.1)         | <b>0.011</b> | <b>0.07</b>      |

GSRS: Gastrointestinal symptom rating scale
